# Supplementary material for: Red Blood Cells-Derived Iron Self–Doped 3D Porous Carbon Networks for Efficient Oxygen Reduction
Source: MDPI journal article supplement (doi:10.3390/catal12030273), 2022-02-28
Supplement: s1 [file s1]

# Supporting Information

## Red Blood Cells-Derived Iron Self-Doped 3D Porous Carbon Networks for Efficient Oxygen Reduction

Zicong Zhang , Xiangli Ru \*, Xiaoli Yang , Zhengyu Bai \*, Lin Yang \*

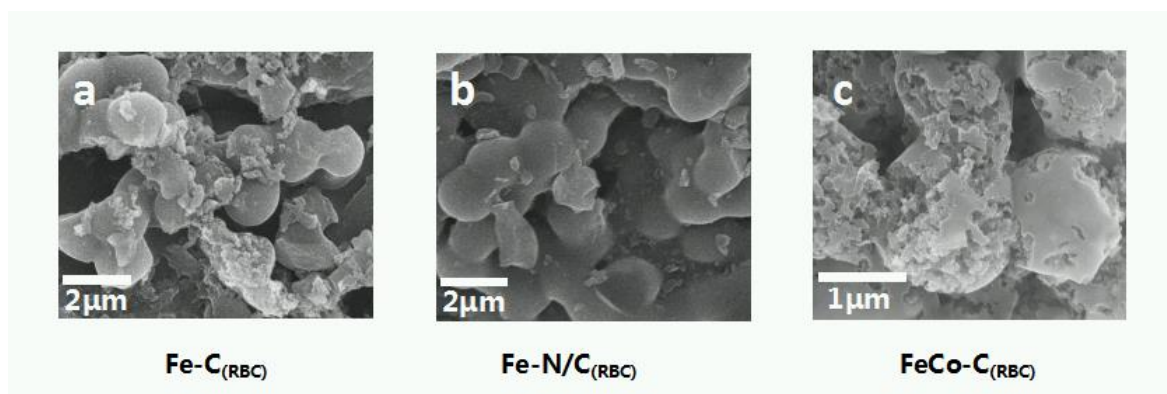

**Figure S1.** SEM images of Fe-C<sub>(RBC)</sub> (a), Fe-N/C<sub>(RBC)</sub> (b), FeCo-C<sub>(RBC)</sub>(c).

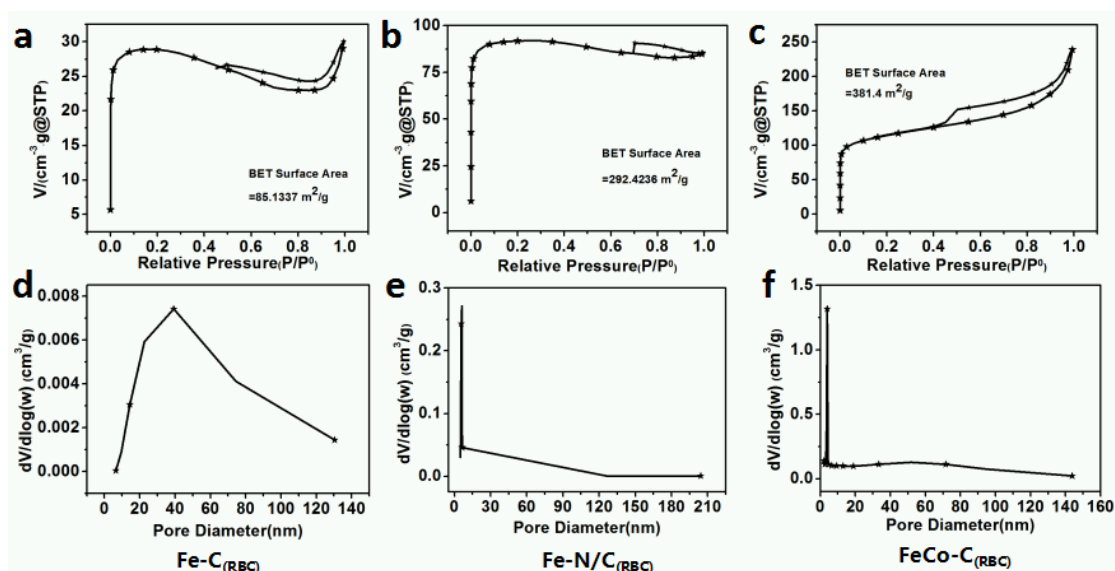

**Figure S2.** N<sub>2</sub> adsorption-desorption isotherms of Fe-C<sub>(RBC)</sub>, Fe-N/C<sub>(RBC)</sub> and FeCo-C<sub>(RBC)</sub> (a-c), pore-size distributions of Fe-C<sub>(RBC)</sub>, Fe-N/C<sub>(RBC)</sub> and FeCo-C<sub>(RBC)</sub> (d-f).

**Table S1.** Atomic content of C 1s, Fe 2p, N 1s, O 1s and Co 2p in Fe-C<sub>(RBC)</sub>, Fe-N/C<sub>(RBC)</sub>, FeCo-C<sub>(RBC)</sub> and FeCo-N/C<sub>(RBC)</sub> from XPS data.

|                           | C1s   | Fe2p  | N1s   | O1s   | Co2p  |
|---------------------------|-------|-------|-------|-------|-------|
|                           | at. % |
| Fe-C <sub>(RBC)</sub>     | 89.91 | 0.59  | 4.48  | 5.02  | -     |
| Fe-N/C <sub>(RBC)</sub>   | 88.12 | 0.57  | 5.42  | 5.89  | -     |
| FeCo-C <sub>(RBC)</sub>   | 83.90 | 0.56  | 4.61  | 9.96  | 0.97  |
| FeCo-N/C <sub>(RBC)</sub> | 83.13 | 0.54  | 5.36  | 10.01 | 0.96  |

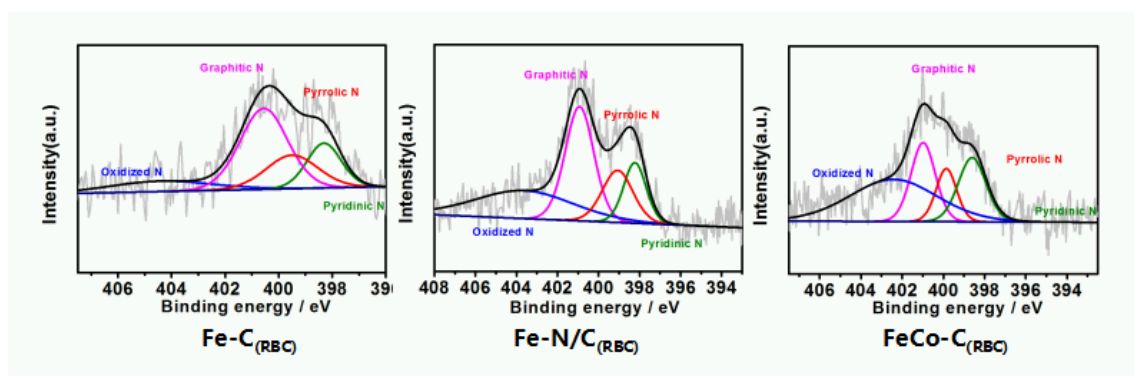

**Figure S3.** High-resolution N1s XPS spectrum of Fe-C<sub>(RBC)</sub>, Fe-N/C<sub>(RBC)</sub> and FeCo-C<sub>(RBC)</sub>.

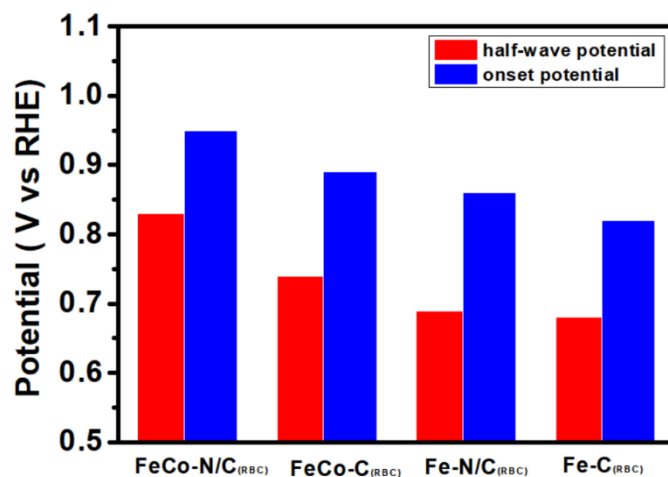

**Figure S4.** The histogram for onset potential and half wave potential of Fe-C<sub>(RBC)</sub>, Fe-N/C<sub>(RBC)</sub>, FeCo-C<sub>(RBC)</sub> and FeCo-N/C<sub>(RBC)</sub> in 0.1 M KOH solution.

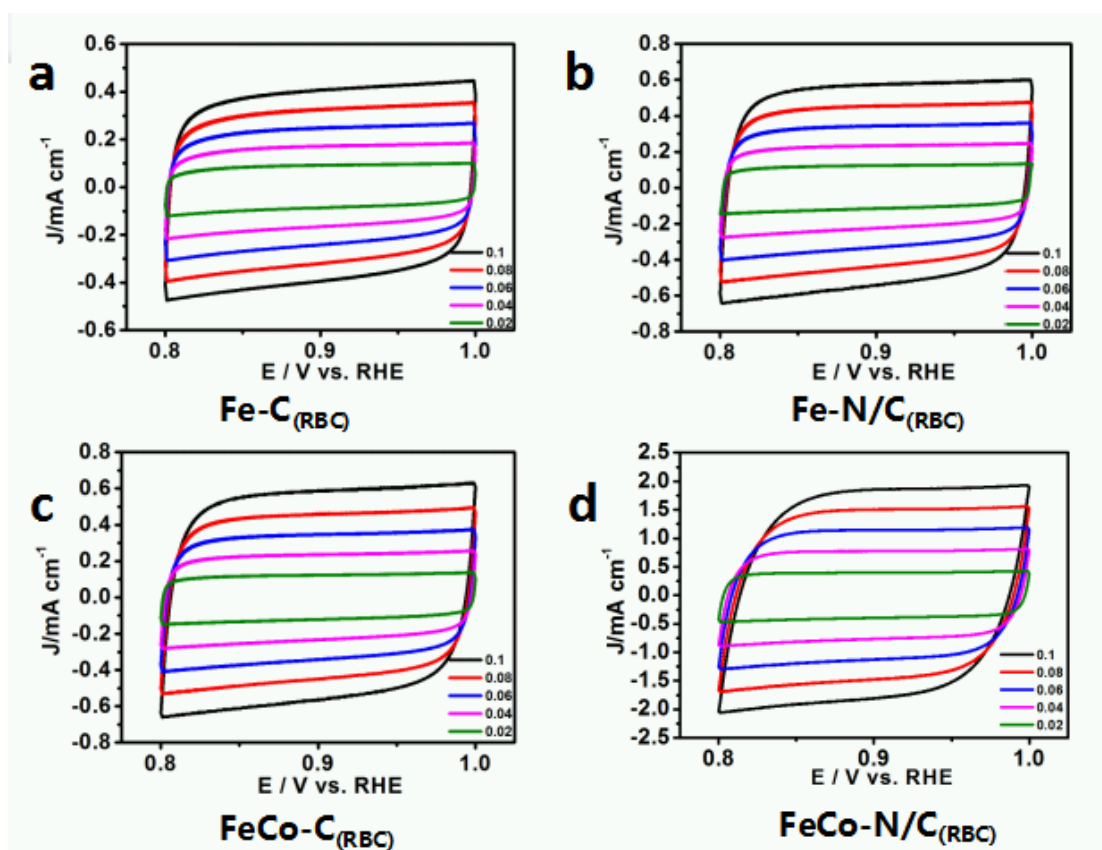

**Figure S5.** Cyclic voltammograms in the region without faradaic processes with different scan rates of Fe-C<sub>(RBC)</sub>(a), Fe-N/C<sub>(RBC)</sub>(b), FeCo-C<sub>(RBC)</sub>(c) and FeCo-N/C<sub>(RBC)</sub>(d).

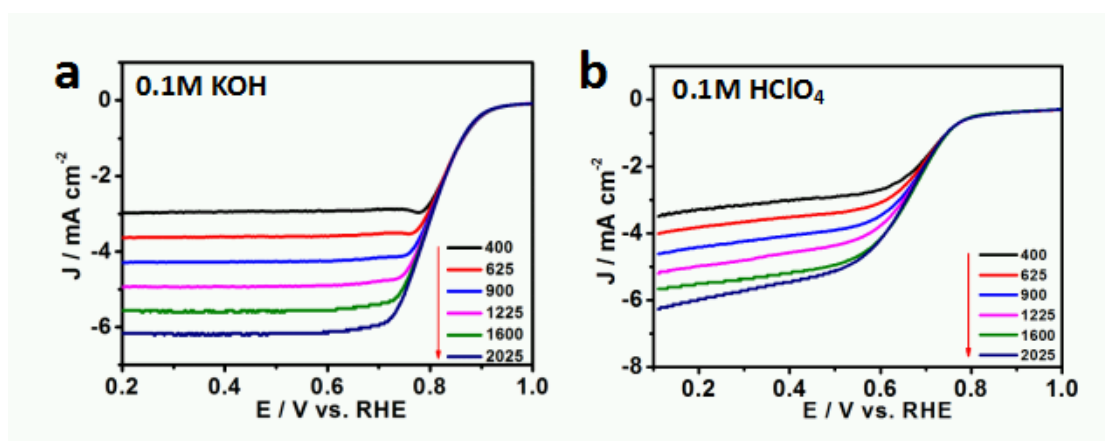

**Figure S6.** LSV curves of FeCo-N/C<sub>(RBC)</sub> at different rotation rate in O<sub>2</sub> saturated 0.1 M KOH solution(a) and 0.1M HClO<sub>4</sub> solution(b).

**Table S2.** The ORR activity data in 0.1 M KOH solution for FeCo-N/C<sub>(RBC)</sub> and other catalysts from previous reports.

| Pt-free or Pt catalysts modified electrodes | Biomass Source  | E <sub>ORR</sub> / V | E <sub>hw</sub> / V | j / mA cm <sup>-2</sup> | References |
|---------------------------------------------|-----------------|----------------------|---------------------|-------------------------|------------|
| 20% Pt/C/GCE                                | -               | 0.96                 | 0.87                | 5.5                     |            |
| BP350C1000/GCE                              | Red blood cells | 0.90                 | 0.78                | 1.3                     | [1]        |
| N-CNT(800)/GCE                              | Red blood cells | 0.91                 | 0.70                | 3.4                     | [2]        |
| FeNC-900/GCE                                | Red blood cells | 0.96                 | 0.85                | 5.6                     | [3]        |
| PBC/900/M/GCE                               | Red blood cells | 1.01                 | 0.86                | 5.2                     | [4]        |
| Co16%-NCNT-T900/GCE                         | Chitosan        | -                    | 0.84                | 5.0                     | [5]        |
| Fe-NP-SP/GCE                                | Woody biomass   | 1.07                 | 0.87                | -                       | [6]        |
| D-PC-1(900)/GCE                             | Seaweed         | 1.01                 | 0.83                | 5.4                     | [7]        |
| CoOP@bio-C/GCE                              | Peanut shells   | 0.91                 | 0.81                | 5.7                     | [8]        |
| GPNCs/GCE                                   | Privet fruit    | -                    | 0.81                | -                       | [9]        |
| NCF900/GCE                                  | Catkins         | 0.82                 | 0.66                | 3.7                     | [10]       |
| AC <sub>1</sub> /GCE                        | Agave sisalana  | 0.84                 | -                   | 3.12                    | [11]       |
| PN/CB/GCE                                   | Pine needles    | 0.86                 | 0.78                | -                       | [12]       |
| AOB700/GCE                                  | Onion peels     | 0.82                 | -                   | 2.35                    | [13]       |
| N-P-Fe-C/GCE                                | Corn silk       | 0.95                 | 0.85                | -                       | [14]       |
| NPAC <sub>Co</sub> /GCE                     | Pomelo peels    | 0.87                 | 0.78                | -                       | [15]       |
| AC-F-U-P/GCE                                | Coconut shells  | 0.96                 | 0.77                | -                       | [16]       |
| FeCo-N/C <sub>(RBC)</sub> /GCE              | Red blood cells | 0.95                 | 0.83                | 5.5                     | This work  |

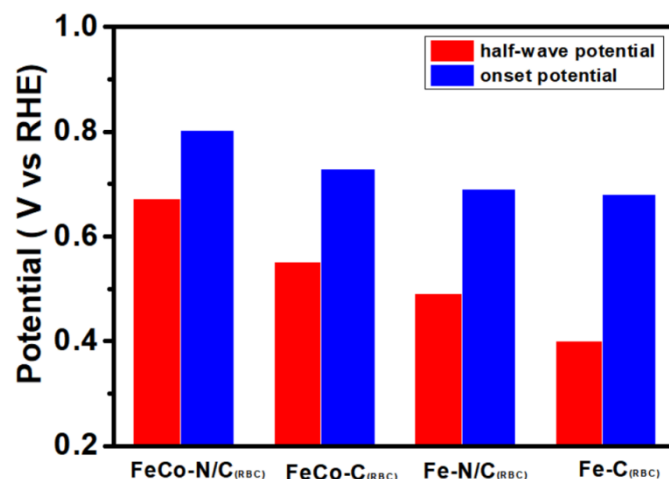

**Figure S7.** The histogram for onset potential and half wave potential of Fe-C<sub>(RBC)</sub>, Fe-N/C<sub>(RBC)</sub>, FeCo-C<sub>(RBC)</sub> and FeCo-N/C<sub>(RBC)</sub> in 0.1 M HClO<sub>4</sub> solution.

## References

- Guo, C.-Z.; Chen, C.-G.; Luo, Z.-L. A novel nitrogen-containing electrocatalyst for oxygen reduction reaction from blood protein pyrolysis. *J. Power Sources* **2014**, *245*, 841–845. <https://doi.org/10.1016/j.jpowsour.2013.07.037>.
- Zheng, J.; Guo, C.; Chen, C.; Fan, M.; Gong, J.; Zhang, Y.; Zhao, T.; Sun, Y.; Xu, X.; Li, M.; et al. High content of pyridinic- and pyrrolic-nitrogen-modified carbon nanotubes derived from blood biomass for the electrocatalysis of oxygen reduction reaction in alkaline medium. *Electrochim. Acta* **2015**, *168*, 386–393. <https://doi.org/10.1016/j.electacta.2015.03.173>.
- Jiang, W.-J.; Hu, W.-L.; Zhang, Q.-H.; Zhao, T.-T.; Luo, H.; Zhang, X.; Gu, L.; Hu, J.-S.; Wan, L.-J. From biological enzyme to single atomic Fe–N–C electrocatalyst for efficient oxygen reduction. *Chem. Commun.* **2018**, *54*, 1307–1310. <https://doi.org/10.1039/c7cc08149a>.
- Lee, J.; Kim, H.S.; Jang, J.-H.; Lee, E.-H.; Jeong, H.-W.; Lee, K.-S.; Kim, P.; Yoo, S.J. Atomic-Scale Engineered Fe Single-Atom Electrocatalyst Based on Waste Pig Blood for High-Performance AEMFCs. *ACS Sustain. Chem. Eng.* **2021**, *9*, 7863–7872. <https://doi.org/10.1021/acssuschemeng.1c01590>.
- Zhang, Y.; Lu, L.; Zhang, S.; Lv, Z.; Yang, D.; Liu, J.; Chen, Y.; Tian, X.; Jin, H.; Song, W. Biomass chitosan derived cobalt/nitrogen doped carbon nanotubes for the electrocatalytic oxygen reduction reaction. *J. Mater. Chem. A* **2018**, *6*, 5740–5745. <https://doi.org/10.1039/c7ta11258k>.
- Li, Y.; Liu, D.; Gan, J.; Duan, X.; Zang, K.; Rønning, M.; Song, L.; Luo, J.; Chen, D. Sustainable and Atomically Dispersed Iron Electrocatalysts Derived from Nitrogen- and Phosphorus-Modified Woody Biomass for Efficient Oxygen Reduction. *Adv. Mater. Interfaces* **2018**, *6*, 6. <https://doi.org/10.1002/admi.201801623>.
- Hao, Y.; Zhang, X.; Yang, Q.; Chen, K.; Guo, J.; Zhou, D.; Feng, L.; Slanina, Z. Highly porous defective carbons derived from seaweed biomass as efficient electrocatalysts for oxygen reduction in both alkaline and acidic media. *Carbon* **2018**, *137*, 93–103. <https://doi.org/10.1016/j.carbon.2018.05.007>.
- Wu, Y.; Chen, Y.; Wang, H.; Wang, C.; Wang, A.; Zhao, S.; Li, X.; Sun, D.; Jiang, J. Efficient ORR electrocatalytic activity of peanut shell-based graphitic carbon microstructures. *J. Mater. Chem. A* **2018**, *6*, 12018–12028. <https://doi.org/10.1039/c8ta02839g>.
- Liu, Y.; Sun, K.; Cui, X.; Li, B.; Jiang, J. Defect-Rich, Graphenelike Carbon Sheets Derived from Biomass as Efficient Electrocatalysts for Rechargeable Zinc–Air Batteries. *ACS Sustain. Chem. Eng.* **2020**, *8*, 2981–2989.

10. Liu, A.; Ma, M.; Zhang, X.; Ming, J.; Jiang, L.; Li, Y.; Zhang, Y.; Liu, S. A biomass derived nitrogen doped carbon fibers as efficient catalysts for the oxygen reduction reaction. *J. Electroanal. Chem.* **2018**, *824*, 60–66. <https://doi.org/10.1016/j.jelechem.2018.07.039>.
11. Fernandes, D.M.; Mestre, A.S.; Martins, A.; Nunes, N.; Carvalho, A.P.; Freire, C. Biomass-derived nanoporous carbons as electrocatalysts for oxygen reduction reaction. *Catal. Today* **2020**, *357*, 269–278. <https://doi.org/10.1016/j.cattod.2019.02.048>.
12. Gao, J.; Chu, X.; He, C.; Yin, Z.; Lu, H.; Li, X.; Feng, J.; Tan, X. Biomass-derived carbon for ORR: Pine needles as a single source for efficient carbon electrocatalyst. *J. Appl. Electrochem.* **2020**, *50*, 1257–1267. <https://doi.org/10.1007/s10800-020-01483-4>.
13. Alonso-Lemus, I.L.; Escobar-Morales, B.; Lardizabal-Gutierrez, D.; de la Torre-Saenz, L.; Quintana-Owen, P.; Rodriguez-Varela, F. Short communication: Onion skin waste-derived biocarbon as alternative non-noble metal electrocatalyst towards ORR in alkaline media. *Int. J. Hydrogen Energy* **2018**, *44*, 12409–12414. <https://doi.org/10.1016/j.ijhydene.2018.10.050>.
14. Wan, W.; Wang, Q.; Zhang, L.; Liang, H.-W.; Chen, P.; Yu, S.-H. N-, P- and Fe-tridoped nanoporous carbon derived from plant biomass: An excellent oxygen reduction electrocatalyst for zinc–air batteries. *J. Mater. Chem. A* **2016**, *4*, 8602–8609. <https://doi.org/10.1039/c6ta02150f>.
15. Zhang, M.; Jin, X.; Wang, L.; Sun, M.; Tang, Y.; Chen, Y.; Sun, Y.; Yang, X.; Wan, P. Improving biomass-derived carbon by activation with nitrogen and cobalt for supercapacitors and oxygen reduction reaction. *Appl. Surf. Sci.* **2017**, *411*, 251–260. <https://doi.org/10.1016/j.apsusc.2017.03.097>.
16. Borghei, M.; Laocharoen, N.; Kibena-Pöldsepp, E.; Johansson, L.-S.; Campbell, J.; Kauppinen, E.; Tammeveski, K.; Rojas, O.J. Porous N,P-doped carbon from coconut shells with high electrocatalytic activity for oxygen reduction: Alternative to Pt-C for alkaline fuel cells. *Appl. Catal. B Environ.* **2017**, *204*, 394–402. <https://doi.org/10.1016/j.apcatb.2016.11.029>.
